# Supplementary material for: One Week Feeding of CDAHFD Induces Steatohepatitis and Mitochondrial Dysfunction with Oxidative Stress in Liver
Source: Preprints.org preprint supplement (doi:10.20944/preprints202105.0136.v1), 2021-05-07
Supplement: Supplementary file 1 [file supplementary]

## Sheet: Sheet1
Table S1. Primer sequences used in this study
No.	Symbols	Description	Primer sequences		Predicted amplicon size (bp)
1	mtDNA	Mitochondrial DNA (mtCox-1 region)	F：	TCGGAGCCCCAGATATAGCA	145
			R：	TTTCCGGCTAGAGGTGGGTA
2	gDNA	Genomic DNA	F：	GCCATGAGTGGACCCTTCTT	84
			R：	GAAAACACGGGGGCAATGAG
3	Il1-β	Interleukin 1 beta	F：	TGCCACCTTTTGACAGTGATG	138
			R：	TGATGTGCTGCTGCGAGATT
4	Tnf-α	Tumor necrosis factor alpha	F：	GTCCCCAAAGGGATGAGAAGTT	124
			R：	TTTGCTACGACGTGGGCTAC
5	Lcn2	Lipocalin 2	F：	ACGGACTACAACCAGTTCGC	192
			R：	AATGCATTGGTCGGTGGGG
6	Mcp1 (Ccl2)	Chemokine (C-C motif) ligand 2	F：	CACTCACCTGCTGCTACTCA	117
			R：	GCTTGGTGACAAAAACTACAGC
7	Pcna	Proliferating cell nuclear antigen	F：	GATGCCGTCGGGTGAATTTG	182
			R：	TCTCTATGGTTACCGCCTCCT
8	Ki67	Antigen identified by monoclonal antibody Ki 67	F：	CTTCTGTGCTGACCCTGATGGG	178
			R：	GTTTCTGCCAGTGTGCTGTTC
9	αSma (Acta2)	Actin, alpha 2, smooth muscle, aorta	F：	AGCCATCTTTCATTGGGATGG	117
			R：	CCCCTGACAGGACGTTGTTA
10	Tgfβ-1	Transforming growth factor, beta 1	F：	AGCTGCGCTTGCAGAGATTA	189
			R：	AGCCCTGTATTCCGTCTCCT
11	Col1a1	Collagen, type I, alpha 1	F：	CGATGGATTCCCGTTCGAGT	197
			R：	CGATCTCGTTGGATCCCTGG
12	Col3a1	Collagen, type III, alpha 1	F：	TGACTGTCCCACGTAAGCAC	105
			R：	GAGGGCCATAGCTGAACTGA
13	Gpx1	Glutathione peroxidase 1	F：	TGCTGCTGAGGGTAGAATGA	74
			R：	ACATGCTGACACCCCTCTTC
14	Gpx2	Glutathione peroxidase 2	F：	CCAGTTCGGACATCAGGAGAA	198
			R：	GTCATGAGGGAGAACGGGTC
15	Cat	Catalase	F：	CTCGCAGAGACCTGATGTCC	78
			R：	GACCCCGCGGTCATGATATT
16	Sod1	Superoxide dismutase 1	F：	CACTTCGAGCAGAAGGCAAG	100
			R：	CCCCATACTGATGGACGTGG
17	Sod2	Superoxide dismutase 2	F：	AGGAGAGTTGCTGGAGGCTA	195
			R：	AGCGGAATAAGGCCTGTTGTT
18	Sod3	Superoxide dismutase 3	F：	CTGCTCGCTCACATAACAGC	145
			R：	GCTGAGGTTCTCTGCACCTGT
19	Nrf2	Nuclear factor, erythroid derived 2, like 2	F：	AGATGACCATGAGTCGCTTGC	152
			R：	GCCAAACTTGCTCCATGTCC
20	Nqo1	NAD(P)H dehydrogenase, quinone 1	F：	TCTCTGGCCGATTCAGAGTG	145
			R：	CCAGACGGTTTCCAGACGTT
21	Ho1	Heme oxygenase 1	F：	GAGCAGAACCAGCCTGAACT	72
			R：	AAATCCTGGGGCATGCTGTC
22	Scd1	stearoyl-Coenzyme A desaturase 1	F：	CCCGGGAGAATATCCTGGTTT	130
			R：	TCGATGAAGAACGTGGTGAA
23	Pparγ	Peroxisome proliferator activated receptor gamma	F：	GCCTATGAGCACTTCACAAGAAAT	115
			R：	GGAATGCGAGTGGTCTTCCA
24	Fasn	Fatty acid synthase	F：	GCAGCTGTTGGTTTGTCCTG	117
			R：	ATTCACTGCAGCCTGAGGTC
25	Srebf-1a	Sterol regulatory element binding transcription factor 1a	F：	GGCCGAGATGTGCGAACT	69
			R：	TTGTTGATGAGCTGGAGCATGT
26	Srebf-1c	Sterol regulatory element binding transcription factor 1c	F：	GGAGCCATGGATTGCACATT	70
			R：	GGCCCGGGAAGTCACTGT
27	G6pc	Glucose-6-phosphatase, catalytic	F：	TGAGACCGGACCAGGAAGTC	195
			R：	GCAAGGTAGATCCGGGACAG
28	Pepck	Phosphoenolpyruvate carboxykinase 1, cytosolic	F：	GCAGTGAGGAAGTTCGTGGA	164
			R：	GTGAGAGCCAGCCAACAGT
F: Forward primer. R: reverse primer.
